# Supplementary material for: Validation of a homology model of Mycobacterium tuberculosis DXS: rationalization of observed activities of thiamine derivatives as potent inhibitors of two orthologues of DXS
Source: Royal Society of Chemistry journal article supplement (doi:10.1039/c5ob01666e), 2015-01-01
Supplement: c5ob01666e1.pdf [file c5ob01666e1.pdf]

## Supporting information

# Validation of a homology model of *Mycobacterium tuberculosis* DXS: Rationalization of observed activities of thiamine derivatives as potent inhibitors of two orthologues of DXS

T. Masini,<sup>a</sup> B. Lacy,<sup>b</sup> L. Monjas,<sup>a</sup> D. Hawksley,<sup>c</sup> A. R. de Voogd,<sup>a</sup> B. Illarionov,<sup>d</sup> A. Iqbal,<sup>c</sup> F. J. Leeper,<sup>c</sup> M. Fischer,<sup>d</sup> M. Kontoyanni<sup>\*b</sup> and A. K. H. Hirsch<sup>\*a</sup>

<sup>a</sup> Stratingh Institute for Chemistry, University of Groningen, Nijenborgh 7, 9747AG Groningen (The Netherlands). E-mail: a.k.h.hirsch@rug.nl

<sup>b</sup> Department of Pharmaceutical Sciences, School of Pharmacy, Southern Illinois University Edwardsville, Edwardsville, IL 62034. E-mail: [mkontoy@siue.edu](mailto:mkontoy@siue.edu)

<sup>c</sup> Department of Chemistry, University of Cambridge, Lensfield Road, Cambridge, CB2 1EW, (UK).

<sup>d</sup> Hamburg School of Food Science, Institute of Food Chemistry, Grindelallee 117, D-20146, Hamburg (Germany)

### Table of contents

|                    |    |
|--------------------|----|
| Figures            | 2  |
| NMR spectra        | 5  |
| HPLC chromatograms | 15 |

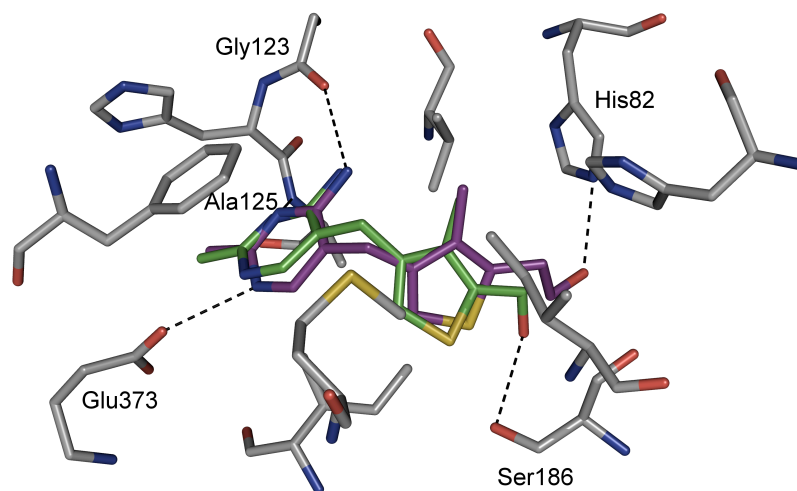

**Figure S1.** Modeled binding modes of deazathiamine **19** and compound **26**. Modeling was performed using the computer program MOLOC.<sup>1</sup> Color code: protein skeleton: C: gray; O: red; N: blue; S: yellow. **19**, skeleton: purple; **26**, skeleton: green. The color code is maintained for all the figures in the Supporting Information, unless otherwise stated. All figures of this type were generated using the software PyMOL.<sup>2</sup>

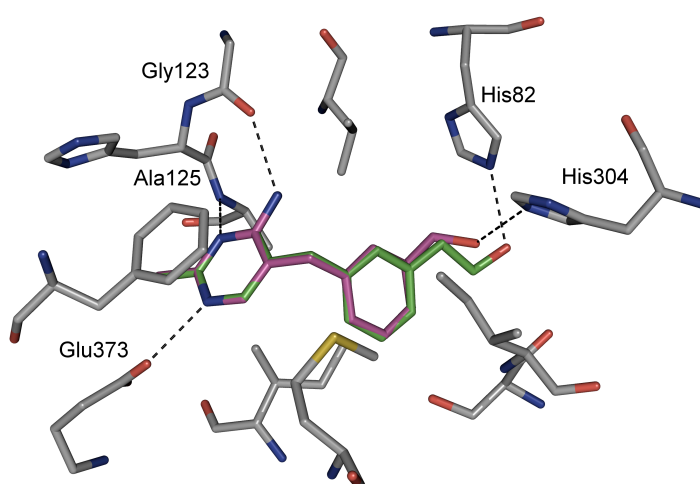

**Figure S2.** Modeled binding modes of **27** and **31**. Color code: **27**, skeleton: green; **31**, skeleton purple.

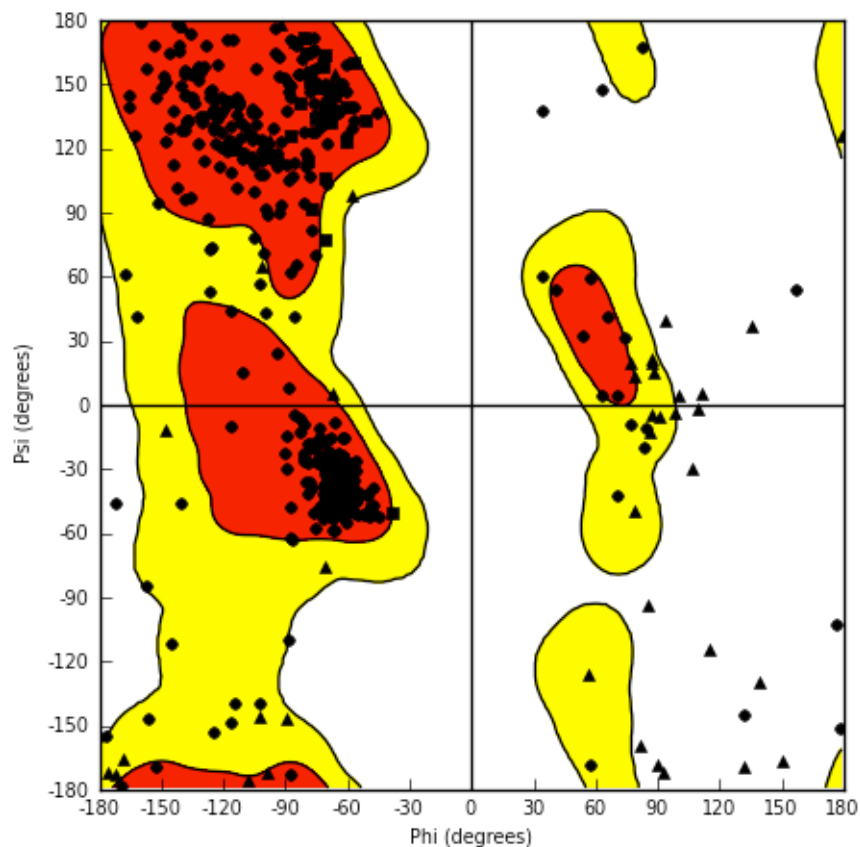

**Figure S3.** Ramachandran plot of the model-built *M. tuberculosis* DXS structure. Red designates common regions of torsion angle values, yellow is indicative of allowed, but not optimal, regions, whereas white corresponds to disallowed regions.

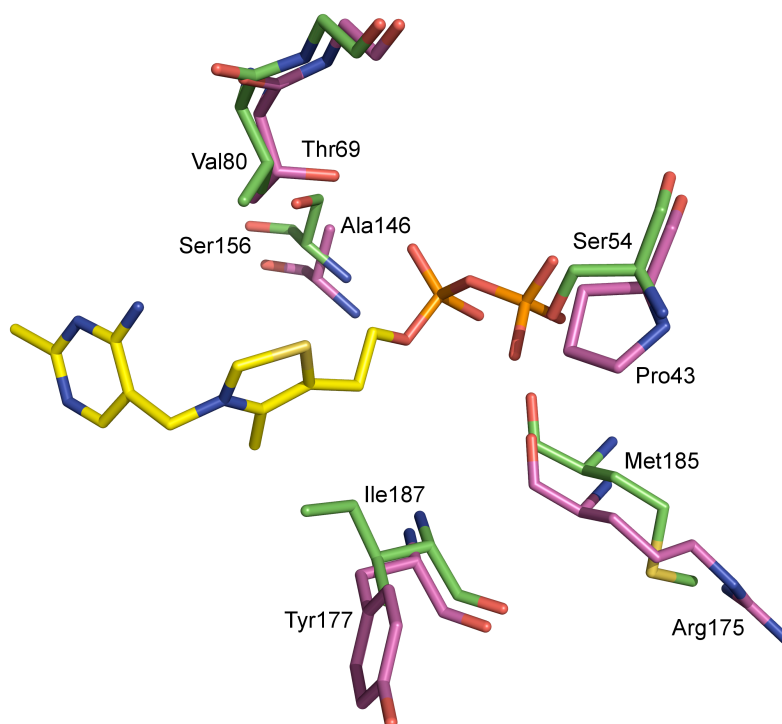

**Figure S4.** Overlapping of the crystal structure of *D. radiodurans* DXS (PDB: 2O1X)<sup>3</sup> with the homology model for *M. tuberculosis* DXS that we have built. A selection of residues is shown, particularly in the thiazolium- and diphosphate-binding subpockets. The cofactor thiamine diphosphate is shown as yellow sticks. Color code: *D. radiodurans* DXS protein skeleton: C: green; *M. tuberculosis* DXS protein skeleton: pink.

## NMR spectra

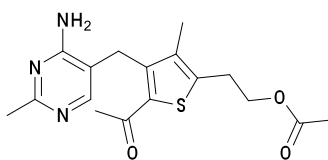

22

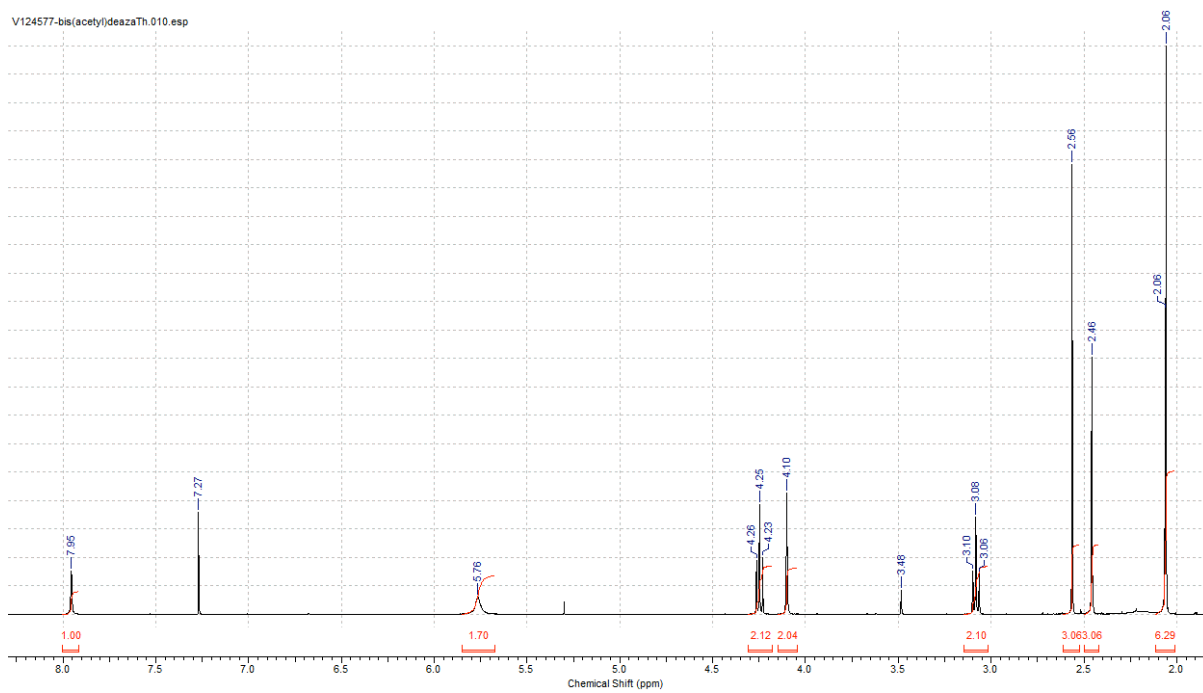

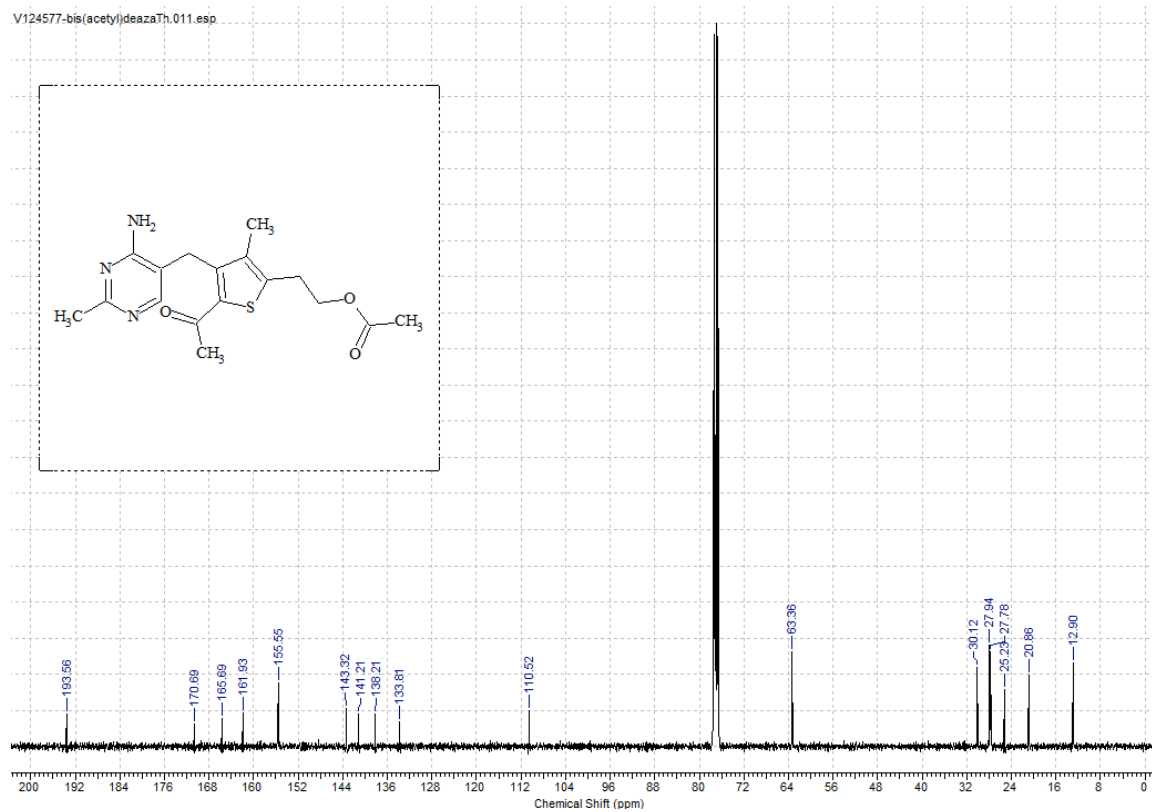

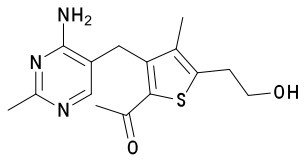

23

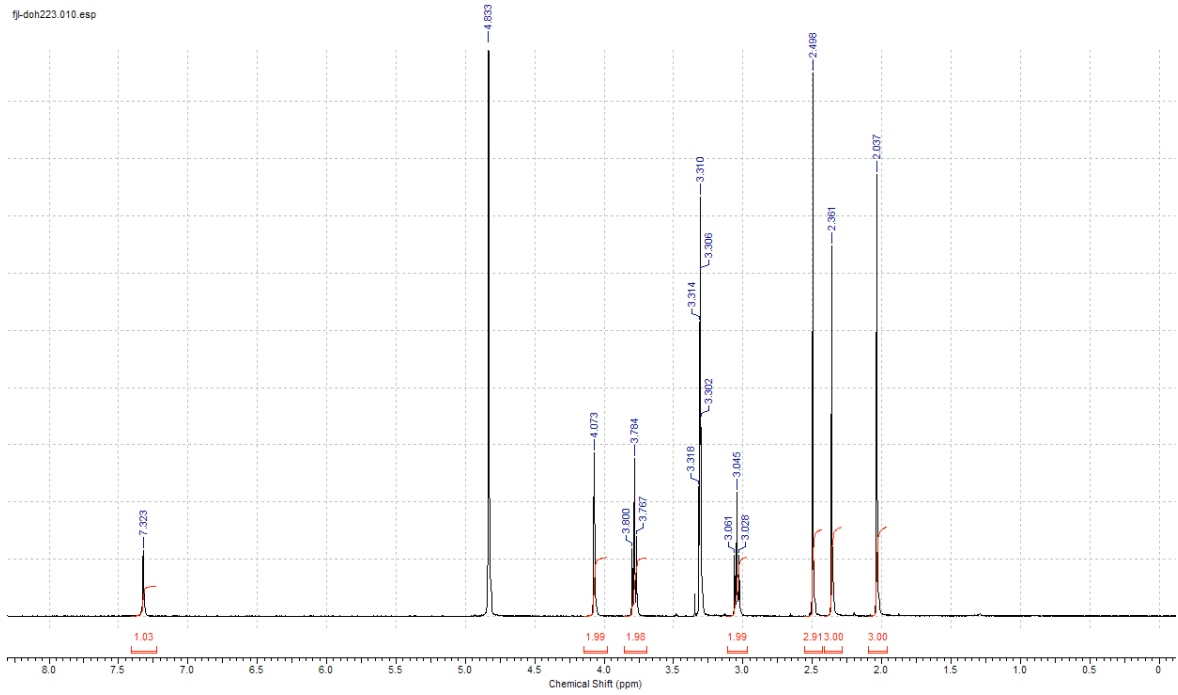

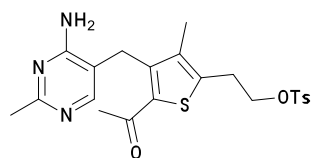

24

fj-doh234.010.esp

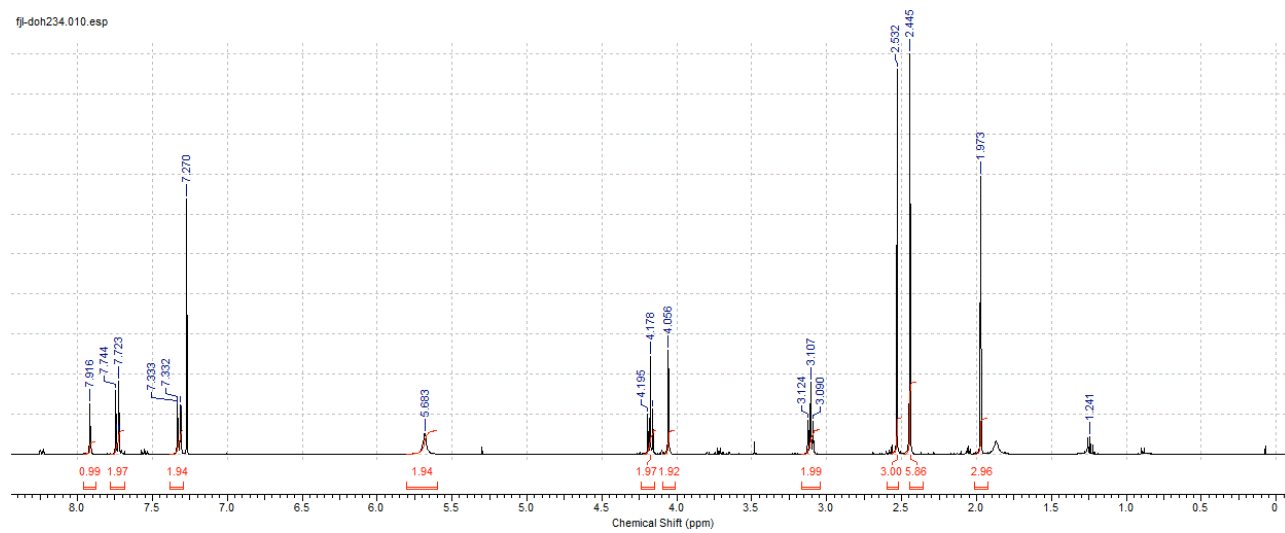

fj-doh234-13c.010.esp

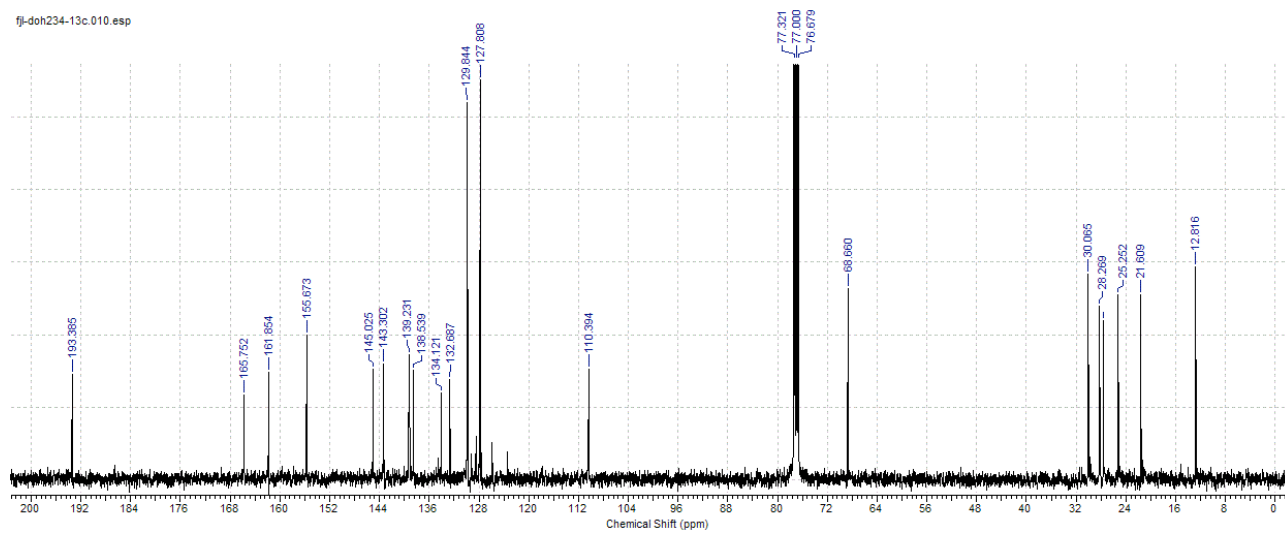



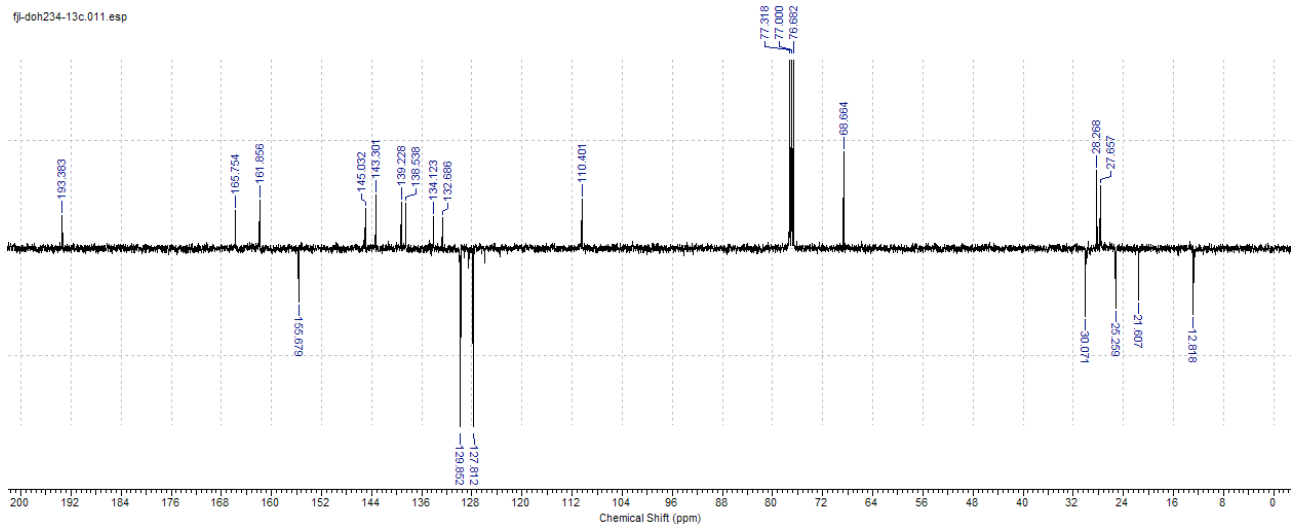

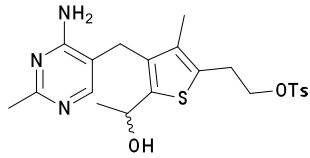

25

fj-doh-rac-co.010.esp

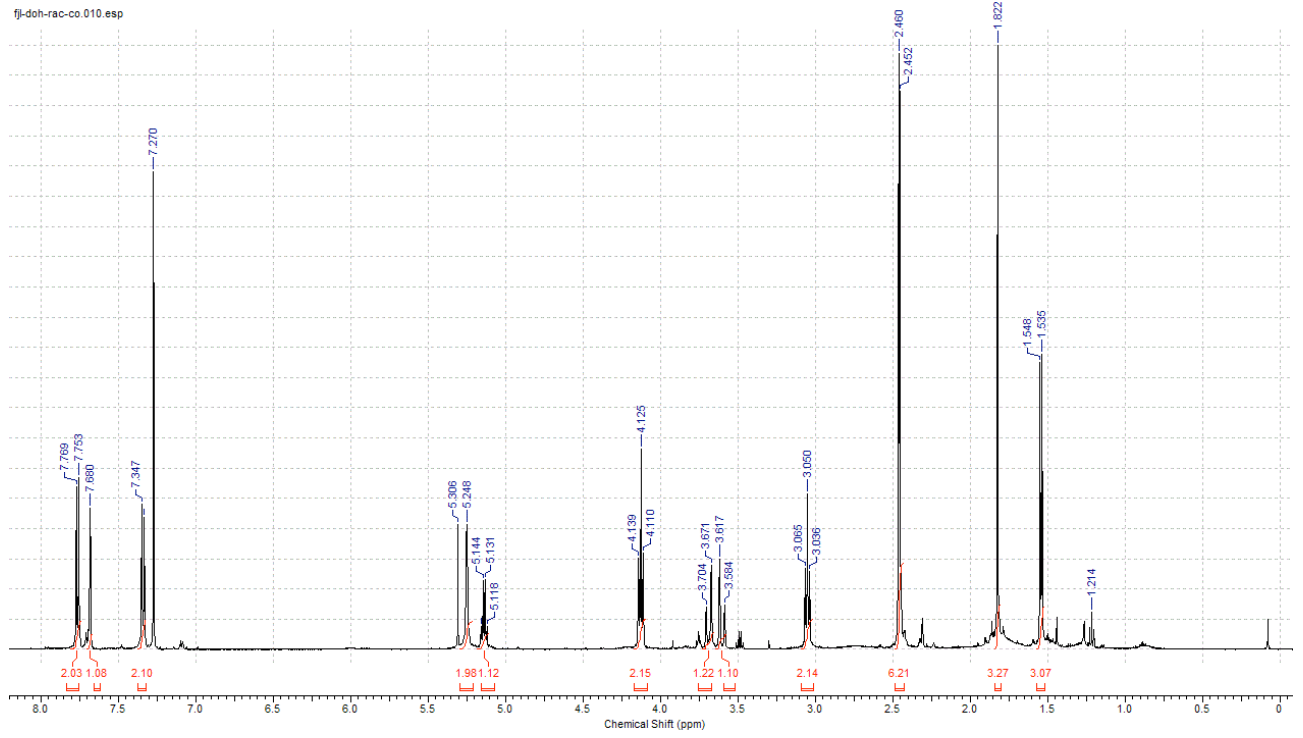

fj-doh-rac-co.011.esp

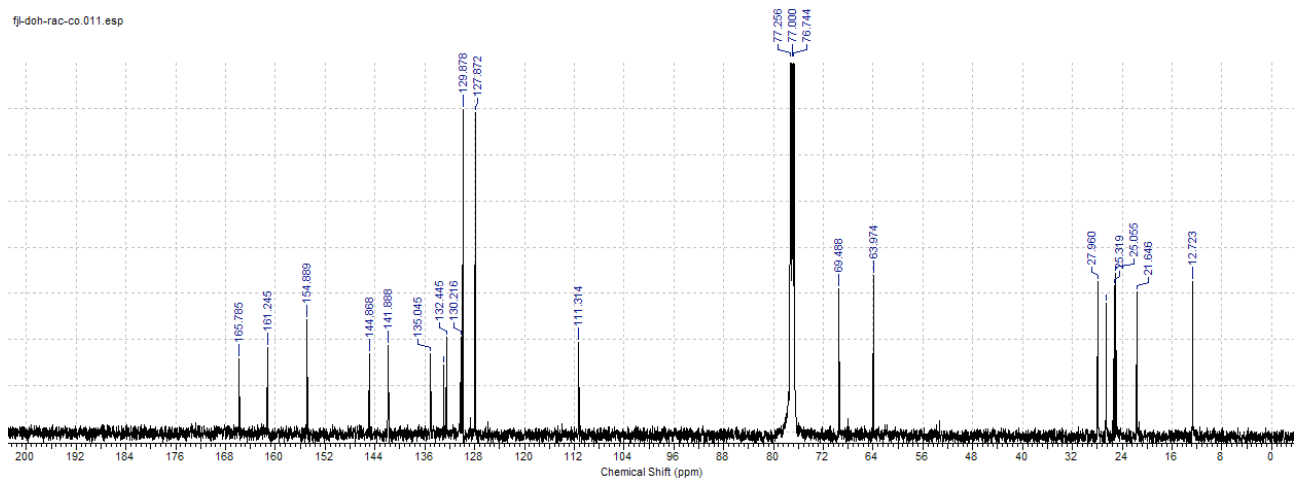

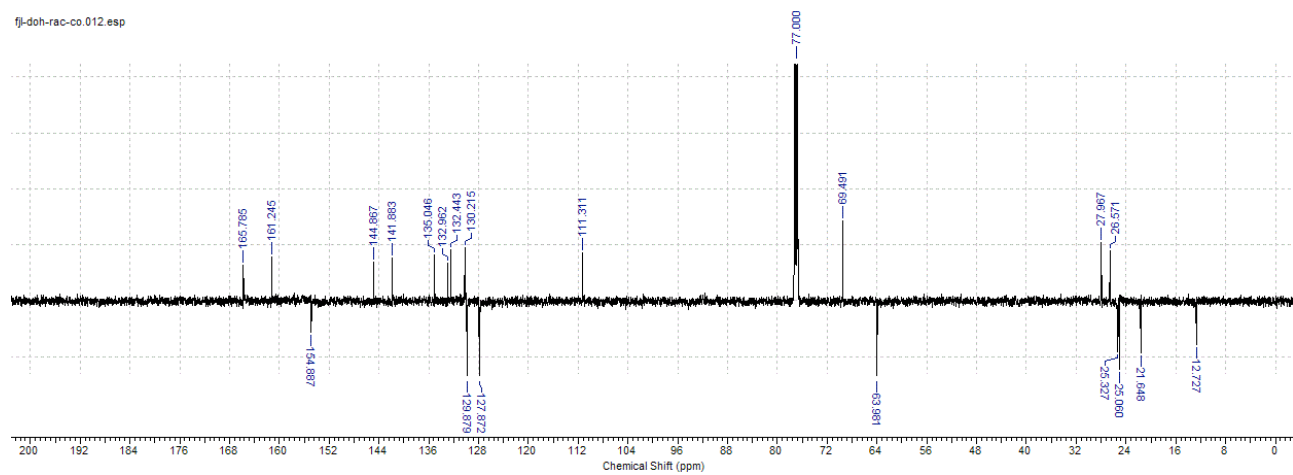

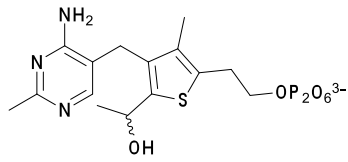

15

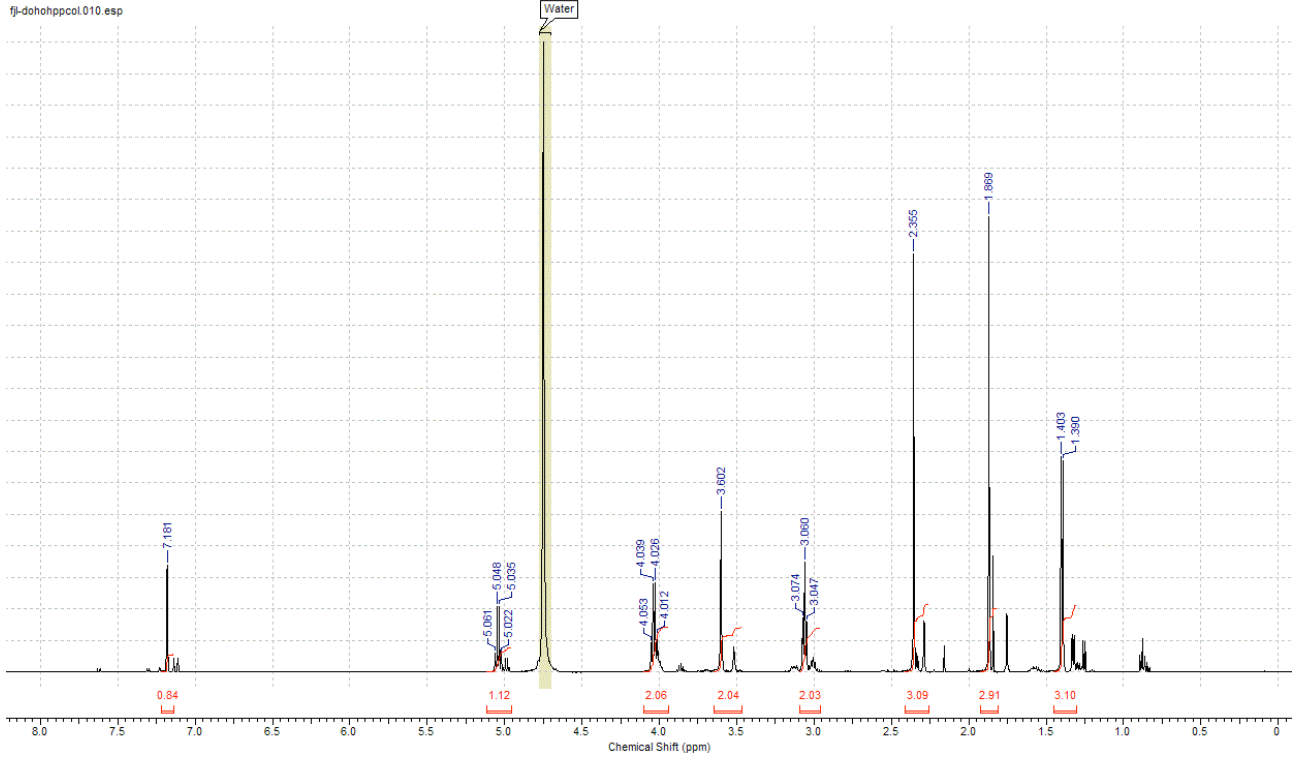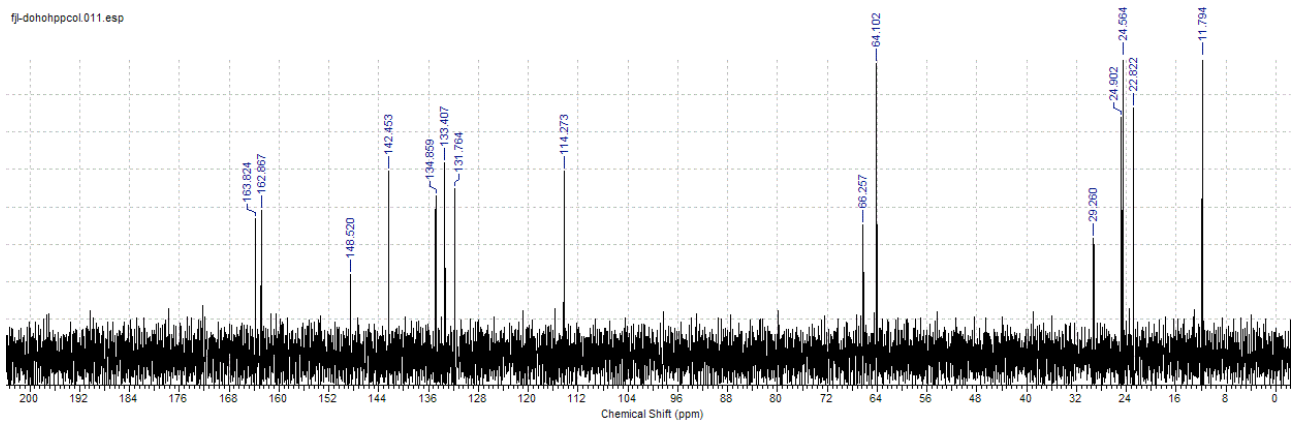

fj-dohohppcol012.esp

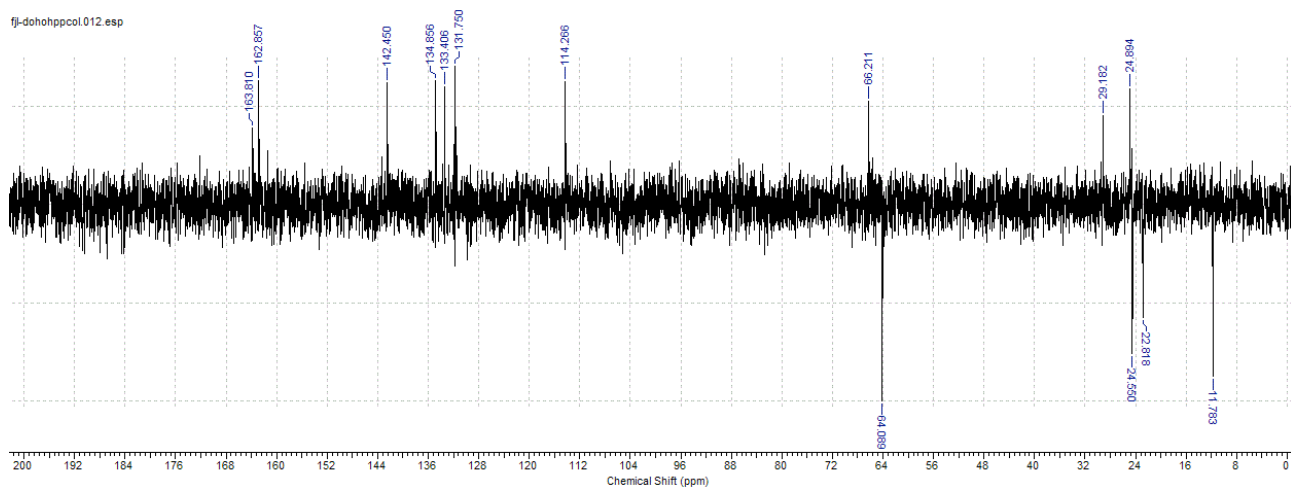



15 / TsO-NH<sub>4</sub><sup>+</sup> (1:1)

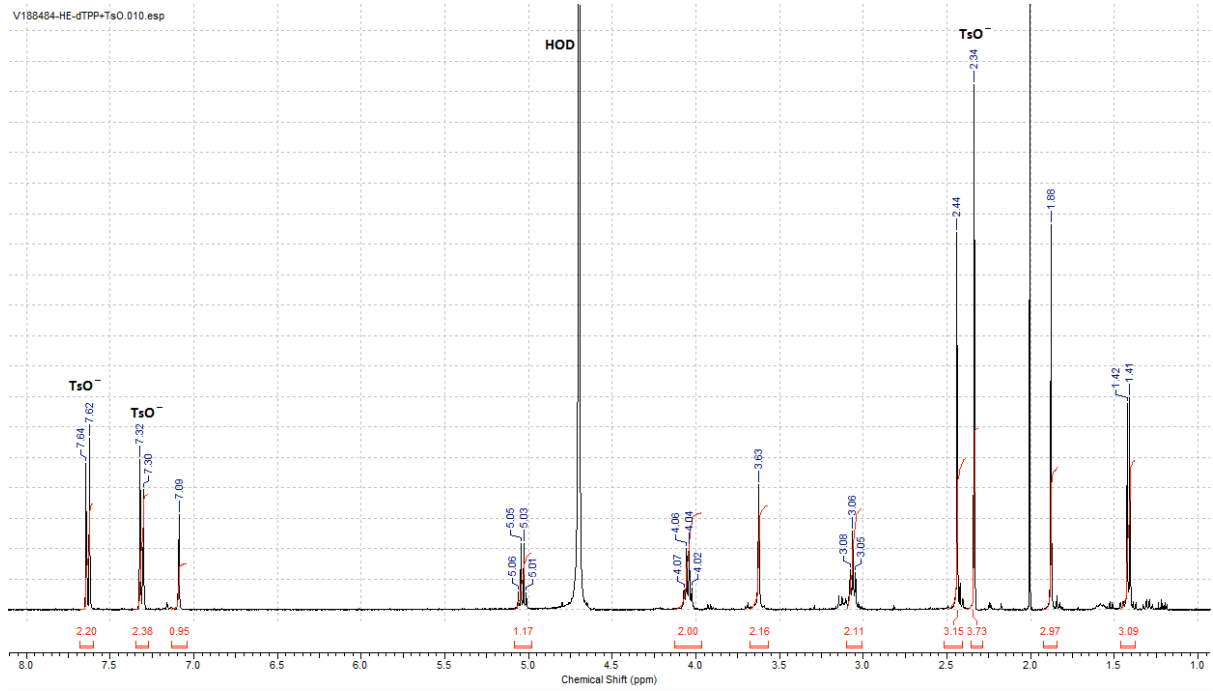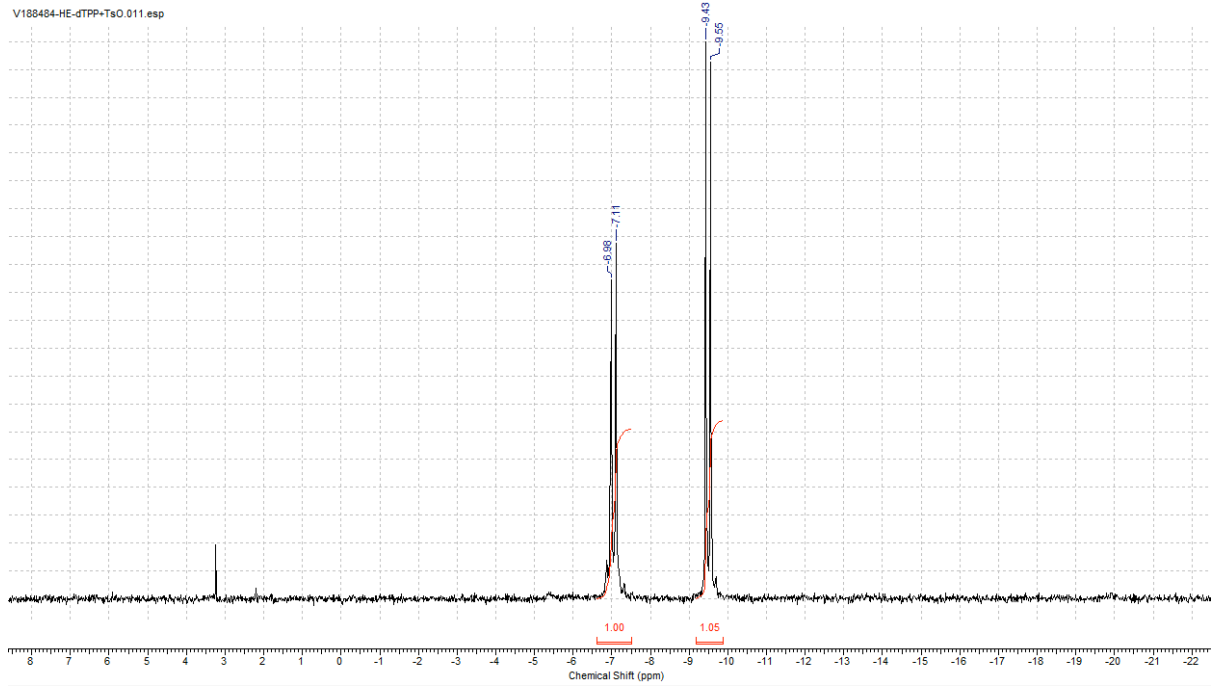

## HPLC chromatograms

### <Chromatogram>

mAU

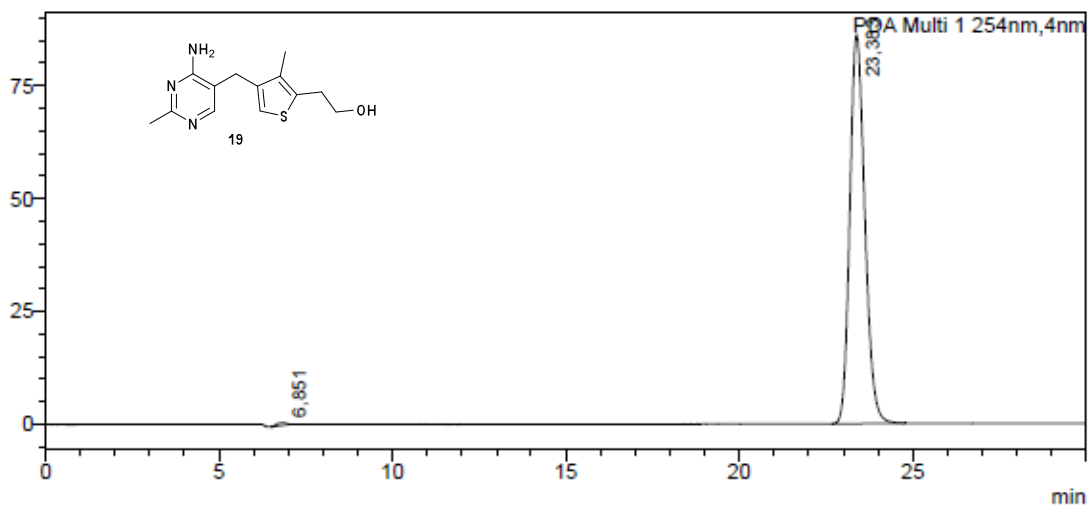

### <Peak Table>

PDA Ch1 254nm

| Peak# | Ret. Time | Area    | Height | Conc.  |
|-------|-----------|---------|--------|--------|
| 1     | 6,851     | 11658   | 589    | 0,448  |
| 2     | 23,383    | 2591049 | 86086  | 99,552 |
| Total |           | 2602706 | 86675  |        |

### <Chromatogram>

mAU

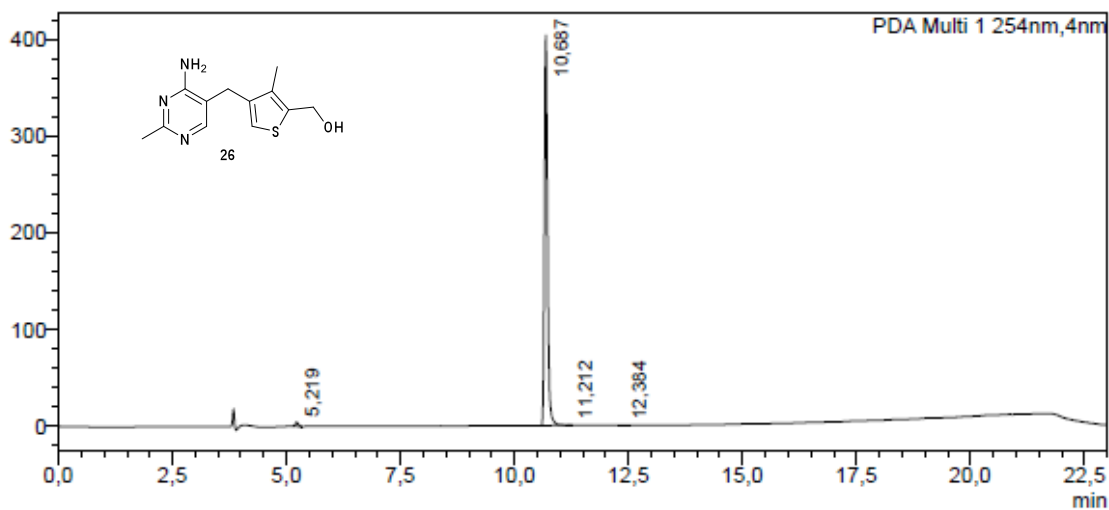

### <Peak Table>

PDA Ch1 254nm

| Peak# | Ret. Time | Area    | Height | Conc.  |
|-------|-----------|---------|--------|--------|
| 1     | 5,219     | 18034   | 4199   | 0,925  |
| 2     | 10,687    | 1928249 | 403853 | 98,882 |
| 3     | 11,212    | 1769    | 460    | 0,091  |
| 4     | 12,384    | 1993    | 400    | 0,102  |
| Total |           | 1950045 | 408912 |        |

### <Chromatogram>

mAU

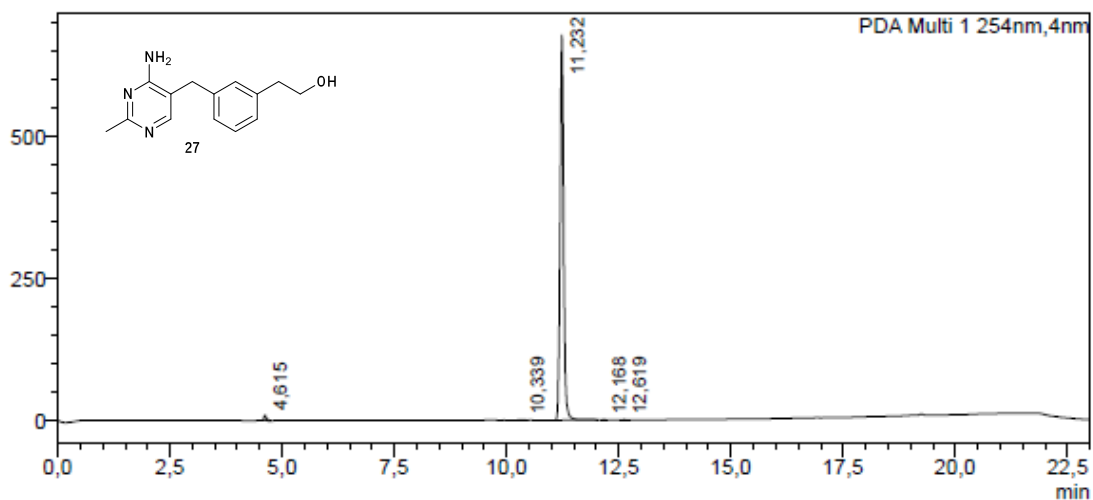

### <Peak Table>

PDA Ch1 254nm

| Peak# | Ret. Time | Area    | Height | Conc.  |
|-------|-----------|---------|--------|--------|
| 1     | 4,615     | 29838   | 8368   | 0,789  |
| 2     | 10,339    | 1349    | 168    | 0,036  |
| 3     | 11,232    | 3750316 | 677517 | 99,106 |
| 4     | 12,168    | 875     | 221    | 0,023  |
| 5     | 12,619    | 1779    | 382    | 0,047  |
| Total |           | 3784156 | 686655 |        |

### <Chromatogram>

mAU

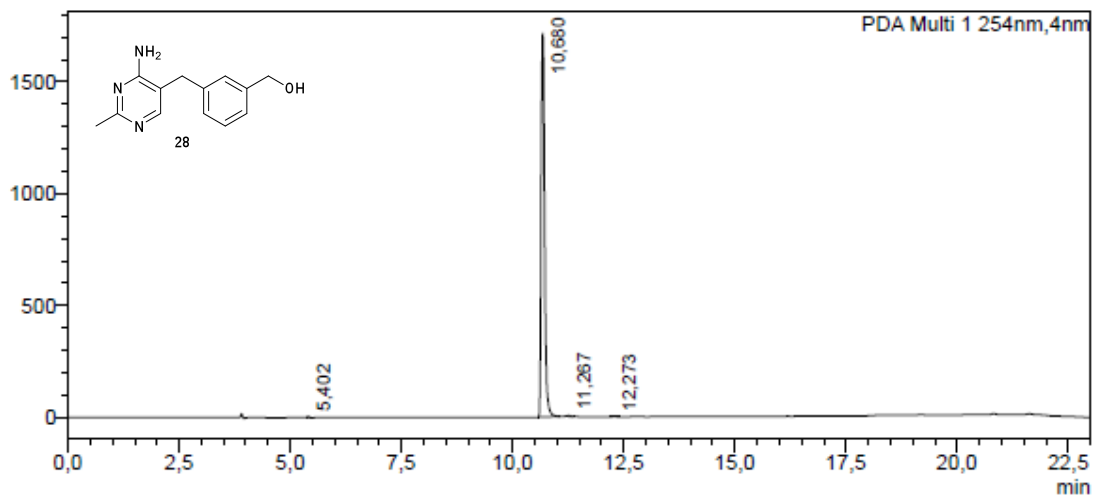

### <Peak Table>

PDA Ch1 254nm

| Peak# | Ret. Time | Area    | Height  | Conc.  |
|-------|-----------|---------|---------|--------|
| 1     | 5,402     | 8093    | 3325    | 0,085  |
| 2     | 10,680    | 9436663 | 1715677 | 99,649 |
| 3     | 11,267    | 14105   | 3551    | 0,149  |
| 4     | 12,273    | 11013   | 2287    | 0,116  |
| Total |           | 9469874 | 1724840 |        |



## References

---

<sup>1</sup> P. R. Gerber and K. Muller, *J. Comput.-Aided Mol. Des.*, 1995, **9**, 251–268.

<sup>2</sup> The PyMOL Molecular Graphics System, Version 1.4. Schrödinger, LLC.

<sup>3</sup> X. Xiang, G. Usunow, G. Lange, M. Busch and L. Tong, *J. Biol. Chem.*, 2007, **282**, 2676–2682.
